# Supplementary material for: Mechanical Properties and Deformation Mechanisms of Graphene Foams with Bi-Modal Sheet Thickness by Coarse-Grained Molecular Dynamics Simulations
Source: Materials (Basel). 2021 Sep 27;14(19):5622. doi: 10.3390/ma14195622 (PMC8509715; doi:10.3390/ma14195622)
Supplement: Supplementary file 1 [file materials-14-05622-s001.zip › materials-1371739-supplementary.pdf]

Supplementary Materials

# Mechanical Properties and Deformation Mechanisms of Graphene Foams with Bi-Modal Sheet Thickness by Coarse-Grained Molecular Dynamics Simulations

Shenggui Liu <sup>1</sup>, Mindong Lyu <sup>1</sup> and Chao Wang <sup>2,3,\*</sup>

<sup>1</sup> School of Mechanics and Civil Engineering, China University of Mining and Technology, Beijing 100083, China; liushg2002@163.com (S.L.); zeqiulmd@126.com (M.L.)

<sup>2</sup> LNM, Institute of Mechanics, Chinese Academy of Sciences, Beijing 100190, China

<sup>3</sup> School of Engineering Science, University of Chinese Academy of Sciences, Beijing 100049, China

\* Correspondence: wangchao@lnm.imech.ac.cn; Tel.: +86-10-82543525

**Citation:** Liu, S.; Lyu, M.; Wang, C. Mechanical Properties and Deformation Mechanisms of Graphene Foams with Bi-Modal Sheet Thickness by Coarse-Grained Molecular Dynamics Simulations. *Materials* **2021**, *14*, 5622. <https://doi.org/10.3390/ma14195622>

Academic Editor: Liviu Marsavina and Jaroslav Kovacik

Received: 23 August 2021

Accepted: 24 September 2021

Published: 27 September 2021

**Publisher's Note:** MDPI stays neutral with regard to jurisdictional claims in published maps and institutional affiliations.

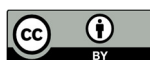

**Copyright:** © 2021 by the authors. Licensee MDPI, Basel, Switzerland. This article is an open access article distributed under the terms and conditions of the Creative Commons Attribution (CC BY) license (<https://creativecommons.org/licenses/by/4.0/>).

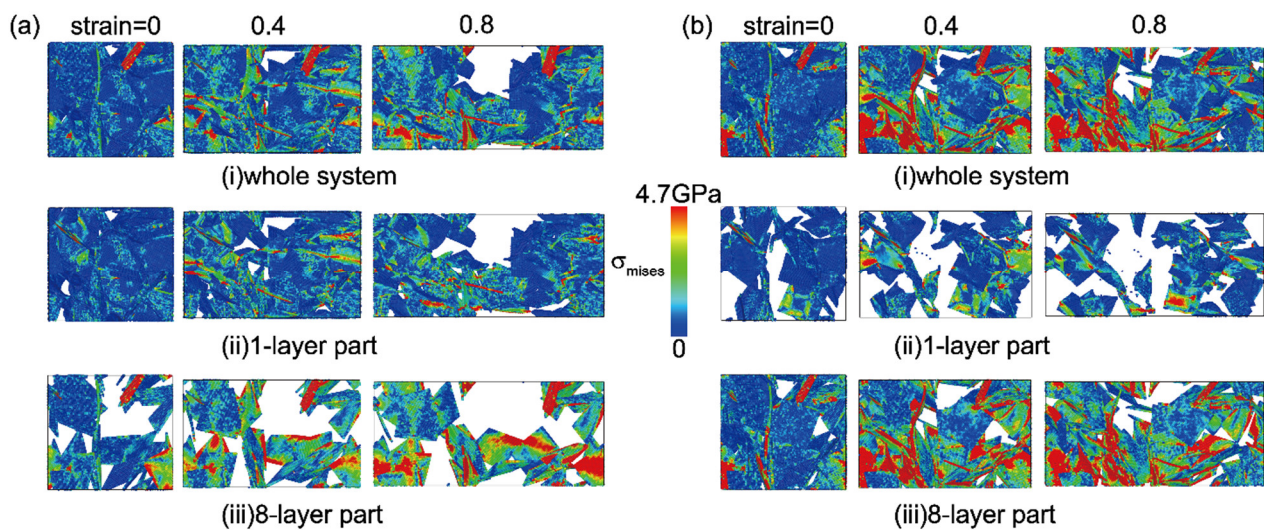

**Figure S1.** (a–i) The distribution of the local von-Mises stress of the whole GrF system with the proportion of 8-layer sheet  $v = 30\%$ , for a direct comparison of the stress distribution in the 1-layer soft and 8-layer sheets, the two parts are displayed separately in (a–ii) and (a–iii); (b–i) The distribution of the local von-Mises stress of the whole GrF system with the proportion of 8-layer sheet  $v = 70\%$ , for a direct comparison of the stress distribution in the 1-layer soft and 8-layer sheets, the two parts are displayed separately in (b–ii) and (b–iii).

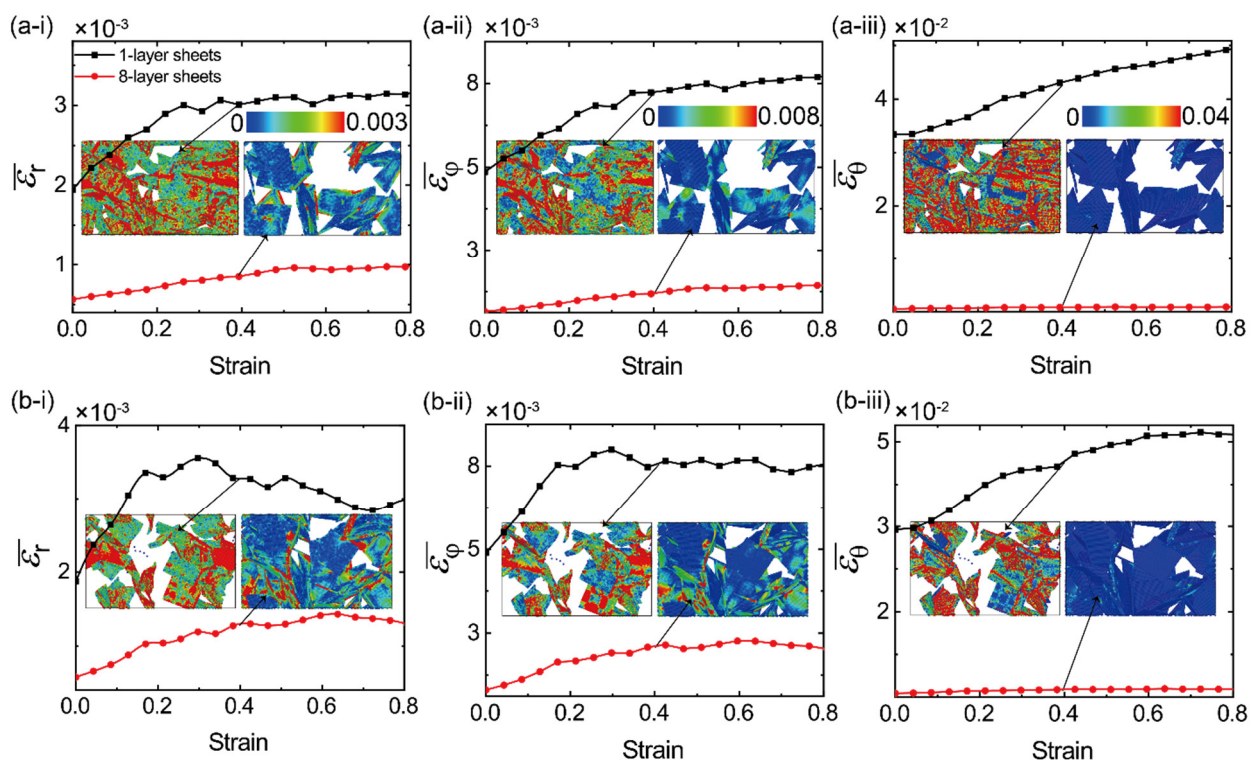

**Figure S2.** The comparison of the variation of (a–i) bond length, (a–ii) in-plane shearing angle and (a–iii) out-of-plane bending angle in 1-layer soft sheets and 8-layer hard sheets, respectively. The distribution of (a–i) the bond strain, (a–ii) shear angle, (a–iii) bending angle in the whole GrF system with the proportion of 8-layer sheet  $v = 30\%$  at the tensile strain of 0.4 for a direct comparison of the strain distribution in 1-layer soft sheets and 8-layer hard sheets, the two parts are displayed separately; The comparison of the variation of (b–i) bond length, (b–ii) in-plane shearing angle and (b–iii) out-of-plane bending angle in 1-layer soft sheets and 8-layer hard sheets, respectively. The distribution of (b–i) the bond strain, (b–ii) shear angle, (b–iii) bending angle in the whole GrF system with the proportion of 8-layer sheet  $v = 70\%$  at the tensile strain of 0.4 for a direct comparison of the strain distribution in 1-layer soft sheets and 8-layer hard sheets, the two parts are displayed separately.
